# Supplementary material for: Commercialisation of high energy density sodium-ion batteries: Faradion's journey and outlook
Source: Royal Society of Chemistry journal article supplement (doi:10.1039/d1ta00376c), 2021-01-01
Supplement: d1ta00376c1.pdf [file d1ta00376c1.pdf]

## Electronic Supplementary Information

### Commercialisation of High Energy Density Sodium-ion Batteries: Faradion's Journey and Outlook

Ashish Rudola, Anthony Rennie, Richard Heap, Seyyed Shayan Meysami, Alex Lowbridge, Francesco Mazzali, Ruth Sayers, Christopher J. Wright and Jerry Barker\*

Faradion Limited, The Innovation Centre, 217 Portobello, Sheffield S1 4DP, UK

Email: [jerry.barker@faradion.co.uk](mailto:jerry.barker@faradion.co.uk)

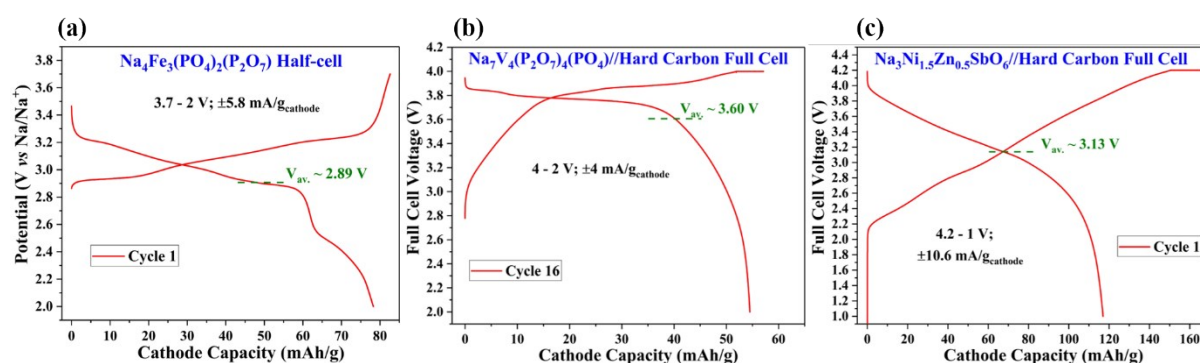

**Fig. S1** Electrochemical cycling curves of some of Faradion's early cathode investigations *circa* late 2011. (a) Cycle 1 of a  $\text{Na}_4\text{Fe}_3(\text{PO}_4)_2(\text{P}_2\text{O}_7)/\text{Na}$  cell. (b) Cycle 16 of a  $\text{Na}_7\text{V}_4(\text{P}_2\text{O}_7)_4(\text{PO}_4)/\text{hard carbon}$  full cell cycled between 4 – 2 V. (c) The first cycle of a  $\text{Na}_3\text{Ni}_{1.5}\text{Zn}_{0.5}\text{SbO}_6/\text{hard carbon}$  full cell cycled between 4.2 – 1 V. The electrolyte used was 0.5 M  $\text{NaClO}_4$  in PC.

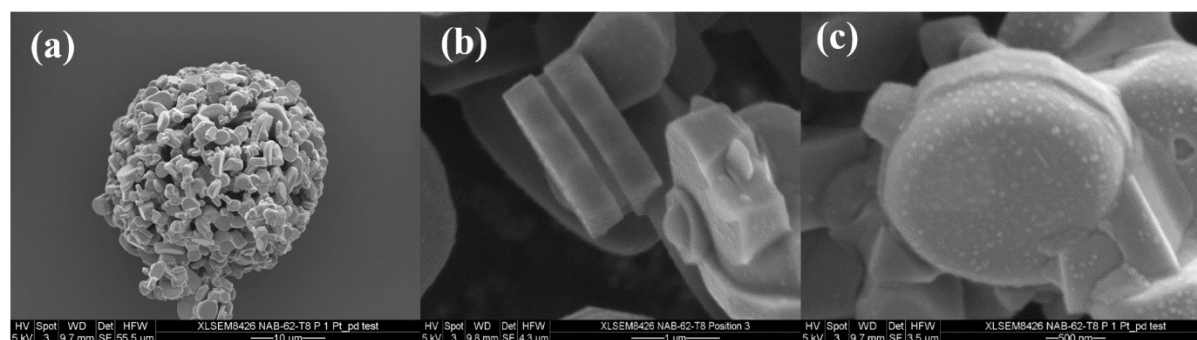

**Fig. S2** FESEM images of Faradion's Gen 2 cathode material. (a) A zoomed-out image showing a  $\sim 20\ \mu\text{m}$  aggregate composed of  $\sim 1\ \mu\text{m}$  primary particles. (b,c) Higher magnification images clearly showing the stacked morphologies of the primary particles. The FESEM images are courtesy of Haldor-Topsøe A/S.

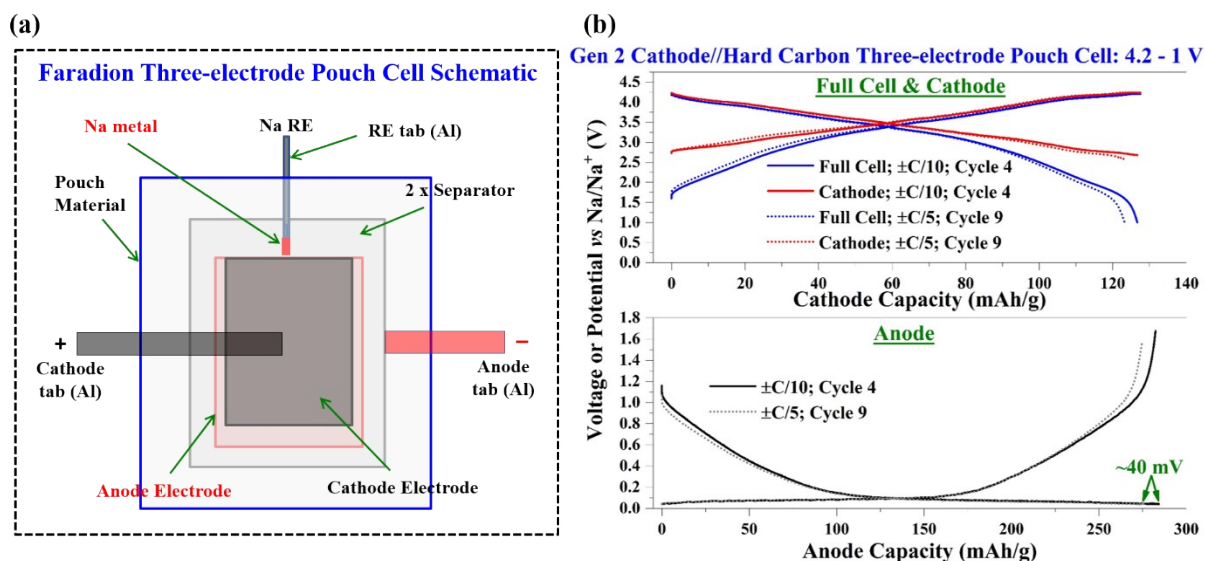

**Fig. S3** Evaluation of cathode and anode potentials in the course of cycling for Faradion's Gen 2 Cathode//Hard Carbon Na-ion cells utilising three-electrode pouch cells. (a) A schematic of Faradion's in-house designed three-electrode pouch cell. The Na RE (reference electrode) is inserted in-between two layers of separators with the Na RE being as close as possible to the cathode//anode stack to ensure accurate readings. (b) Example of three-electrode cycling curves obtained at  $\pm C/10$  or  $\pm C/5$  rate when the Na-ion cell is cycled between 4.2 – 1 V. Due to higher internal resistance in three-electrode cells owing to the use of two polyolefinic separators, performance in a three-electrode cell will be inferior than in two-electrode cells especially at higher rates. As such, the hard carbon potential at 4.2 V indicated by the three-electrode cell ( $\square 40$  mV) is the lower limit and likely to be higher in actual two-electrode cells. Despite this, a 40 mV value, even upon repeated cycling, is more than high enough to ensure no Na plating.

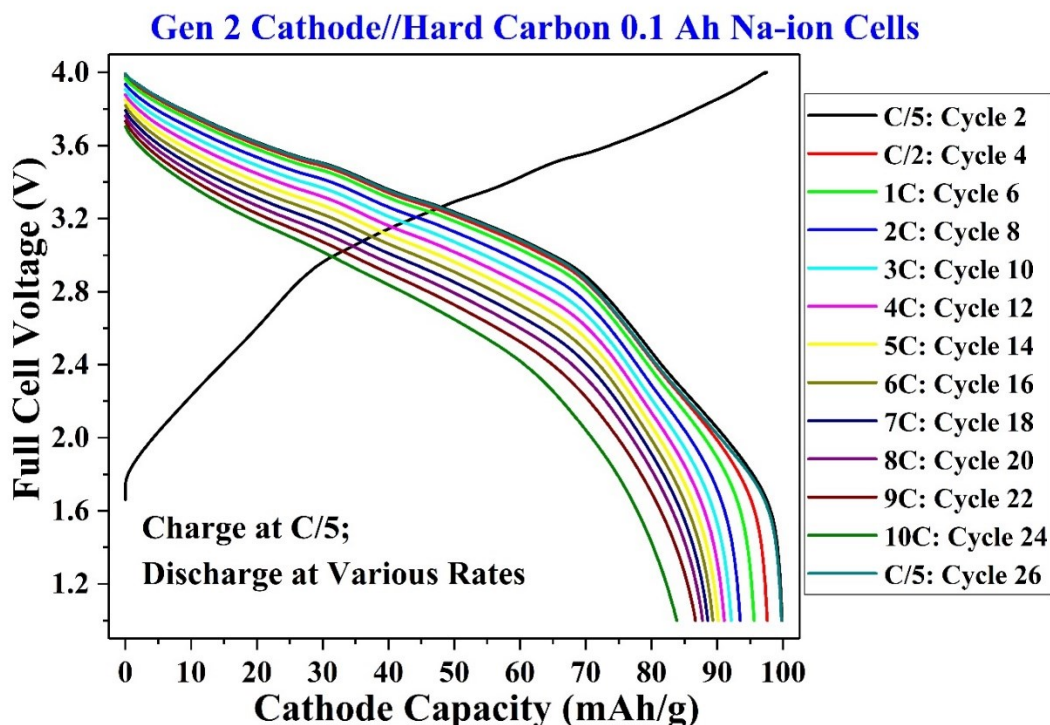

**Fig. S4** Rate performance of Faradion's 0.1 Ah Na-ion pouch cells utilising its Gen 2 cathode and commercial hard carbon anode. The full cell was charged at C/5 at all rates while being discharged at various rates as indicated for two cycles each, before being cycled at  $\pm C/5$  again for the last two cycles.

**Table S1** Practical specifications of some of the hard carbon precursors screened by Faradion.

| #  | Precursor                  | Formulation wt. % | Type                    | As-received moisture content | As-received form   | Cellulose content (wt.%) | Initial drying | Initial crushing | Purification | Carbonisation | Milling | Milling energy | Pyrolysis yield (wt.%) | Total yield (wt.%) | Mass of hard carbon per £10 precursor (kg) | Tap density (g/cm <sup>3</sup> ) |
|----|----------------------------|-------------------|-------------------------|------------------------------|--------------------|--------------------------|----------------|------------------|--------------|---------------|---------|----------------|------------------------|--------------------|--------------------------------------------|----------------------------------|
| 1  | Charcoal                   | 100               | Charred lignocellulosic | Low                          | Chunks             | 45                       | ✓              | ✓                | ✓            | ✗             | ✓       | High           | 80-85                  | 80-85              | 6.48                                       | 0.59                             |
| 2  | Biochar                    | 100               | Charred lignocellulosic | 33 wt. %                     | Small chunks       | 45                       | ✗              | ✓                | ✓            | ✗             | ✓       | High           | 72                     | 48-49              | 2.03                                       | 0.59                             |
| 3  | Potato starch              | 100               | Polysaccharide          | Low                          | Fine powder        | 0                        | ✗              | ✗                | ✗            | ✓             | ✓       | Low            | 40-41                  | 26-27              | 0.06                                       | 0.84                             |
| 4  | Rice hull                  | 100               | Lignocellulosic         | Low                          | Small flakes       | 35                       | ✗              | ✓                | ✓            | ✗             | ✓       | Low            | 44-55                  | ---                | ---                                        | 0.78                             |
| 5  | Olive stone                | 100               | Lignocellulosic         | Low                          | Fine powder        | 32                       | ✗              | ✗                | ✓            | ✗             | ✓       | High           | 32                     | 19                 | 1.40                                       | 0.70                             |
| 6  | Lignin                     | 100               | Lignin                  | 47.5 wt. %                   | Powder             | 0                        | ✓              | ✗                | ✓            | ✗             | ✓       | Low            | 43-44                  | 22-23              | 3.95                                       | 0.81-0.85                        |
| 7  | Walnut shell               | 100               | Lignocellulosic         | Low                          | Powder             | 24                       | ✗              | ✗                | ✓            | ✗             | ✓       | High           | 30                     | ---                | ---                                        | 0.79                             |
| 8  | Granulated sugar           | 100               | Disaccharide            | Low                          | Granulates         | 0                        | ✗              | ✗                | ✗            | ✓             | ✓       | Low            | 44-50                  | 27                 | 3.91                                       | 0.85                             |
| 12 | GS/Lignin                  | 75:25             | Saccharide - Lignin     | 11.9 wt. %                   | Granulates, powder | 0                        | ✓              | ✗                | ✓            | ✓             | ✓       | High           | 49-50                  | 26                 | 3.94                                       | 0.78                             |
| 13 | GS/Lignin                  | 50:50             | Saccharide - Lignin     | 23.7 wt. %                   | Granulates, powder | 0                        | ✓              | ✗                | ✓            | ✓             | ✓       | Moderate       | 48                     | 24-25              | 3.89                                       | 0.81                             |
| 14 | Anthracite*                | 100               | Coal (92-98 wt. % C)    | 3.1 wt. %                    | Grains             | 0                        | ✓              | ✗                | ?            | ✗             | ✓       | Very High      | 90-91                  | 87-89              | 28.39                                      | 1.14                             |
| 15 | Cellulose paper            | 100               | Cellulose               | Low                          | Paper              | 100                      | ✗              | ✓                | ✗            | ✓             | ✓       | Low            | 54                     | 18                 | ---                                        | ---                              |
| 16 | Microcrystalline Cellulose | 100               | Cellulose               | Low                          | Fine powder        | 100                      | ✗              | ✗                | ✗            | ✗             | ✓       | Low            | 22                     | 22                 | 0.31                                       | ---                              |
| 17 | Coconut shell              | 100               | Lignocellulosic         | Low                          | Half shells        | 48                       | ✓              | ✓                | ✓            | ✓             | ✓       | Very High      | 93                     | 18                 | 0.12                                       | 0.87                             |
| 18 | Coconut shell charcoal     | 100               | Charred lignocellulosic | Low                          | Small chips        | ---                      | ✗              | ✓                | ✓            | ✗             | ✓       | Very High      | 76.4                   | 52-53              | 1.23                                       | ---                              |
| 19 | Douglas fir bark           | 100               | Lignocellulosic         | High                         | Chunks             | < 20                     | ✓              | ✓                | ✓            | ✓             | ✓       | Low            | 94                     | 33.3               | 0.44                                       | 0.89                             |
| 21 | Glucosamine HCL            | 100               | Saccharide              | Low                          | Powder             | 0                        | ✗              | ✗                | ✗            | ✓             | ✓       | Low            | 62-63                  | 19-20              | 0.09                                       | 0.70                             |
| 22 | Pomegranate peel           | 100               | Lignocellulosic         | Low                          | Powder             | 17-22                    | ✗              | ✗                | ✓            | ✓             | ✓       | Low            | 89-90                  | 17-18              | 0.11                                       | ---                              |
| 23 | Chicken manure             | 100               | Fertiliser              | 32 wt. %                     | pellet             | ---                      | ✗              | ✓                | ✓            | ✓             | ✓       | Low            | ---                    | ---                | 7.14                                       | ---                              |

\* Soft carbon

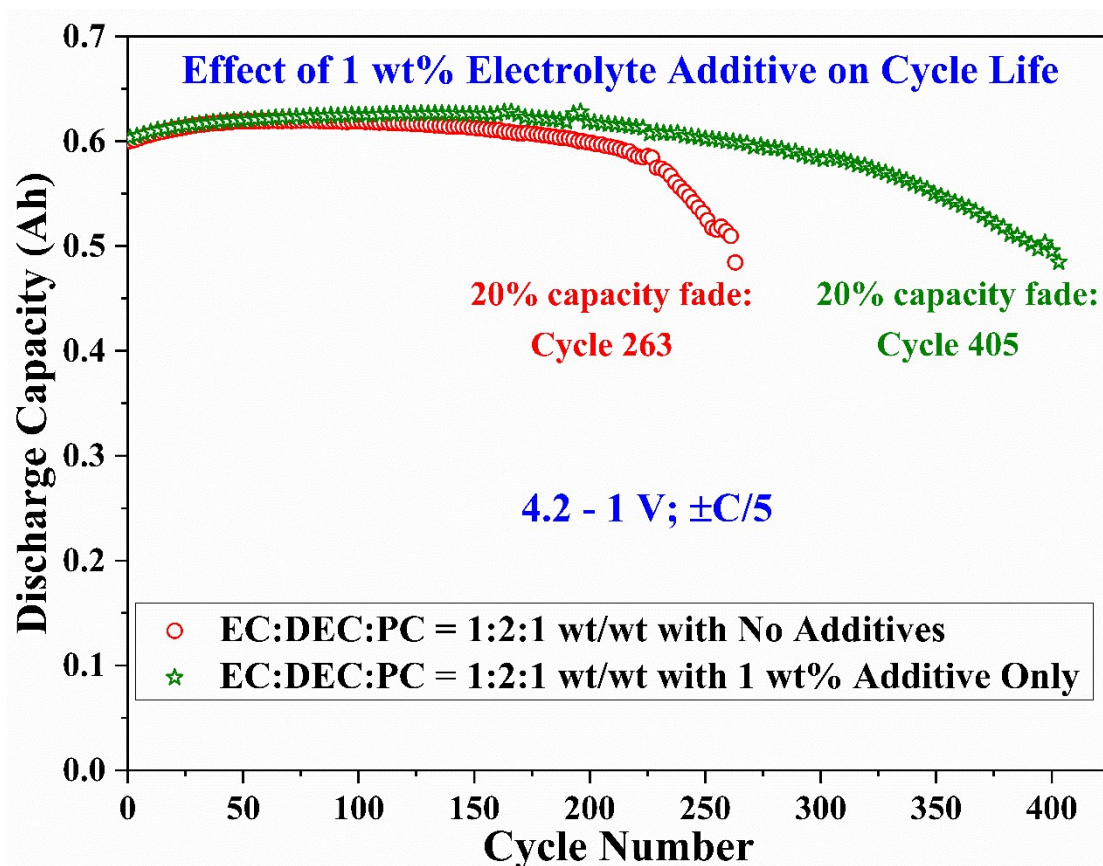

**Fig. S5** Effect of 1 wt% electrolyte additive (with respect to solvent wt) in an EC:DEC:PC = 1:2:1 wt/wt based electrolyte on Faradion's old and unoptimized 0.6 Ah Na-ion pouch cells utilising its Gen 2 cathode and commercial hard carbon anode. The full cells were cycled between 4.2 – 1 V at  $\pm C/5$  at 30 °C.

**Supplementary Note 1: Abuse testing on Faradion 2 Ah and 10 Ah pouch cells at the fully charged state**

For the abuse testing, 10 Ah and 2 Ah pouch cells were fabricated within projects part funded by Innovate UK, the UK's innovation agency. These 2 and 10 Ah pouch cells were tested by Warwick Manufacturing Group, following test protocols defined in *IEC 62660-2 - Secondary lithium-ion cells for the propulsion of electric road vehicles - Part 2: Reliability and abuse testing*. Prior to the abuse testing, the cells were formed, degassed and cycled 20 times. Details on each test are mentioned below.

**External Short Circuit Test:** For the external short test, the state of charge (SOC) of the pouch cell was adjusted to 100 % SOC (full cell voltage of 4.2 V) and then, the terminals of the pouch cell were connected to each other using a low-resistance connection to effectively short-circuit the cell for 10 minutes. This resulted in a minor expansion of the pouch cell and the cell temperature rose to a maximum of 96 °C. However, no violent reaction was observed and the subsequent contraction of the pouch suggested that the expansion was largely caused by heating rather than decomposition of the cell components leading to gassing.

**Overcharge Test:** The overcharge test involved adjusting the pouch cell to 100 % SOC and this was followed by further charging at a 1 C rate. No violent reaction was observed and the maximum temperature of the pouch cell reached just 24 °C. This test was stopped when the cell capacity reached the pass criterion of twice its rated capacity.

**Hot Box Test:** The high temperature endurance test, commonly known as a hot box test, involved adjusting the SOC of the cell to 100 %, before placing it in an oven and raising the temperature at 5 °C/minute to 130 °C. This temperature was then maintained for a period of 30 minutes. During this time, a minor voltage drop was observed temporarily and no violent reaction occurred.

**Crush Tests:** Crush tests were performed in two ways, by applying force from a different direction in each case. During the flat crush test, the cell was adjusted to 100 % SOC and laid on a flat surface, face-up. A crushing force was then applied, using a round crushing tool, until a force of 1000 times the weight of the cell was achieved. During the edge-on crush test, the cell was adjusted to 100 % SOC and the cell was then placed on its side between two plates. A crushing force was then applied to the edge of the cell, using a bar-shaped crushing tool, until the cell deformed by > 15 % of its original width. In both cases, no violent reaction occurred and there were negligible changes in temperature or voltage.

**Nail Penetration Test:** For this test, the cell was adjusted to 100 % SOC and then a 3 mm diameter steel nail was made to drive through the cell. This nail was held in place until the cell temperature returned to ambient. No violent reaction was observed, and the maximum temperature reached was just 41 °C. Note: this test is not part of the IEC 62660-2 test protocol; however, we included this popular abuse test as passing this test successfully is important from a safety point of view.

In summary, the abuse testing results on Faradion's first generation product pouch cells have been very positive, indicating the excellent safety characteristics of this Na-ion technology.

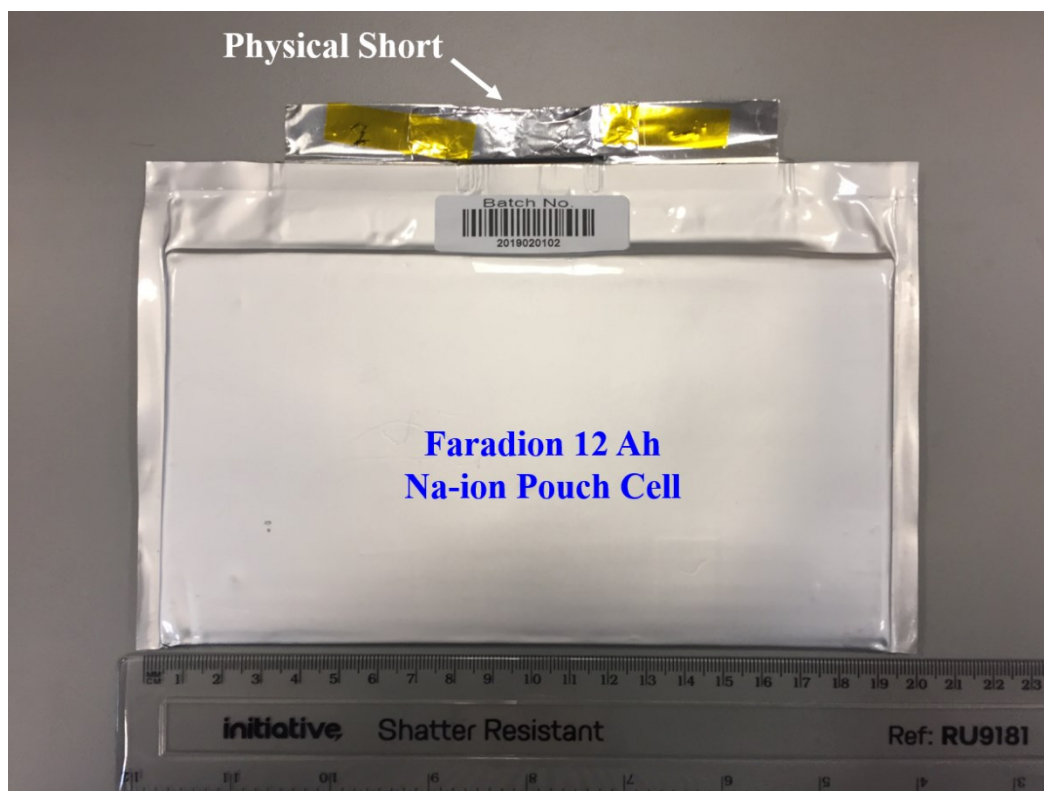

**Fig. S6** An example of how Faradion stores and ships its commercial Na-ion pouch cells. The figure above showcases a 12 Ah pouch cell manufactured by one of Faradion's commercial partners, which was shipped and then received at Faradion in the shorted state, with a shunt connected between the cathode and anode terminals to cause a physical short.



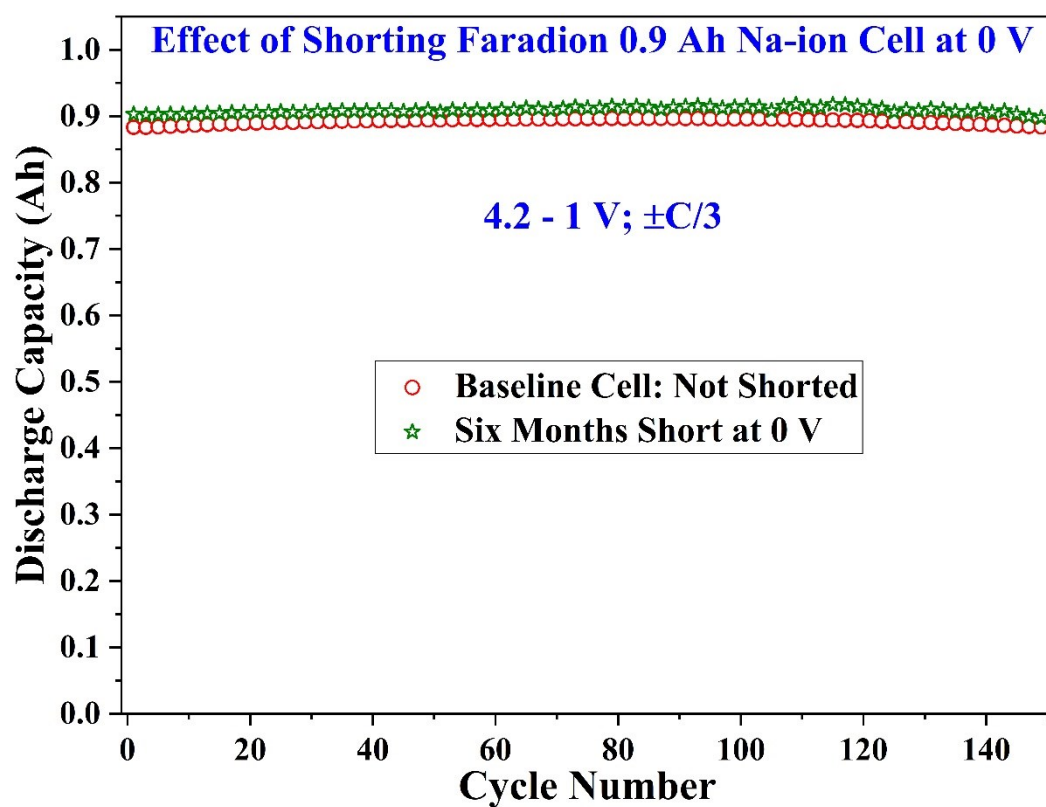

**Fig. S7** Long-term cycling of Faradion Na-ion 0.9 Ah pouch cells with one pouch cell having been kept at 0 V for six months in ambient environment ( $\sim 19^\circ\text{C}$ ) after formation cycling, while the other cell having been cycled as normal after formation cycling (without shorting at 0 V). An actual low resistor shunt was connected between the cathode and anode terminals for the shorted cell during the six-month storage at 0 V.

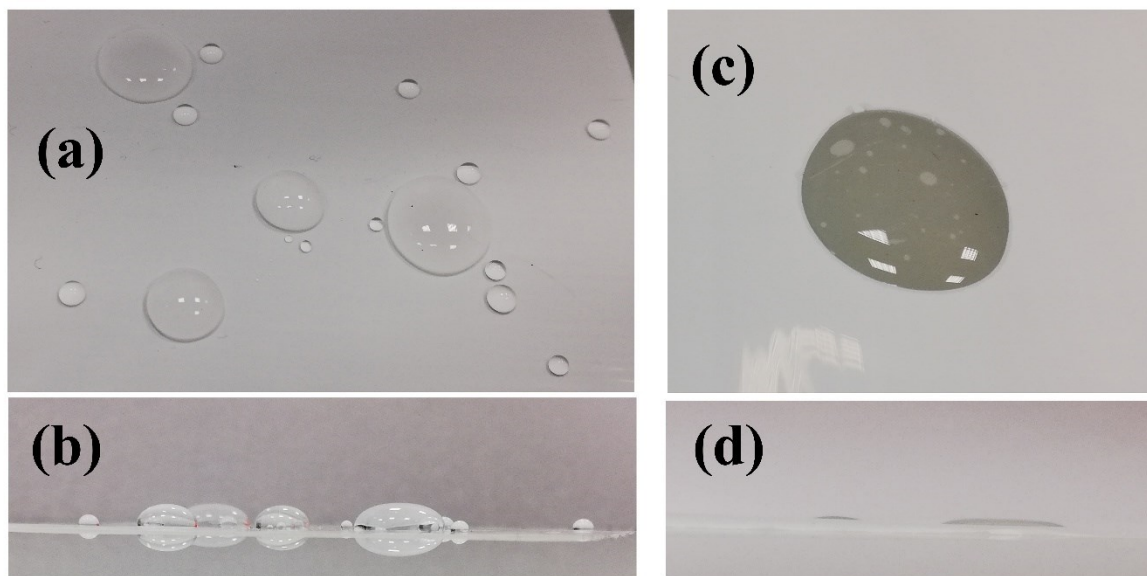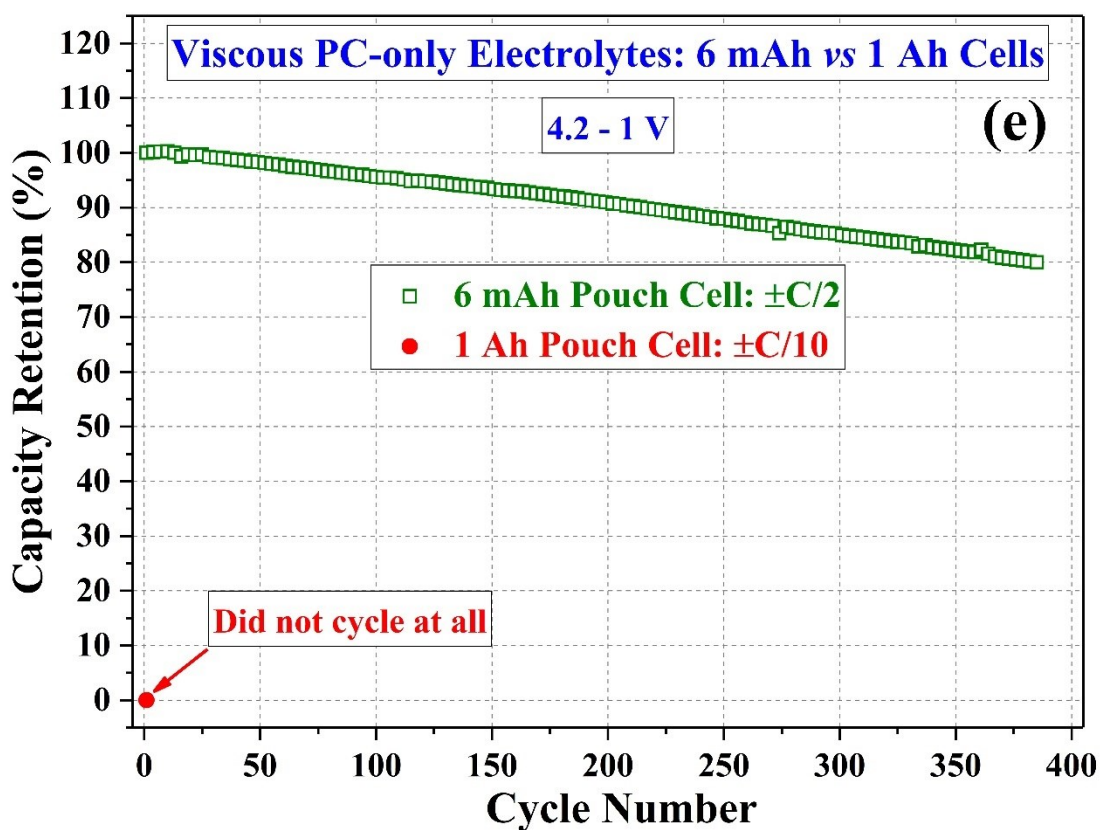

**Fig. S8** (a-d) Electrolyte wetting results on commercial polyolefinic Celgard 2500 separators using (a, b) 17 m NaClO<sub>4</sub> in water water-in-salt concentrated electrolyte and (c, d) PC-dominant electrolyte with PC wt % > 75 % in the solvent blend. For both electrolytes, images are shown from the top (a, c) and perpendicularly side-on (b, d) with respect to the separator. Both sets of experiments were identical, with the only difference being the electrolyte used. It can clearly be seen that the water-in-salt concentrated electrolyte does not wet the separator to any practically relevant degree, while a PC-dominant electrolyte can satisfactorily wet the commercial separator. (e) Effect of cell size in scaling-up viscous PC-only electrolytes. When using NaPF<sub>6</sub> in just PC solvent as the electrolyte (with non-diluting additives), the performance obtained in experimental 6 mAh Na-ion pouch cells is satisfactory: 385 cycles to 20% capacity fade at  $\pm C/2$  rate. However, when this cell design was scaled to 1 Ah Na-ion pouch cells, the cell did not even cycle at  $\pm C/10$  during the formation cycles.



## Supplementary Note 2: Closed-cup flash point testing of various Na-ion liquid electrolytes

Table S2 lists the closed-cup flash point testing results on various liquid electrolytes along with the type of closed-up testing method used for each sample.

**Method:** For each sample, ~200 – 250 ml was supplied to an external contractor and results from 2-3 runs for each sample were used to accurately estimate the flash point. The closed-cup method used has been indicated for each sample, as indicated. The Abel closed-cup method is suitable to a temperature of 70 °C; for more thermally stable liquids demonstrating a flash point > 40 °C, the Pensky Marten method should be used.<sup>1</sup> For samples with no flash point detected below 120 °C, the experiment was ceased at 120 °C by the contractor due to excessive black smoke, indicating decomposition of the electrolyte without reaching a flash point.

**Discussion:** An example of a widely used commercial electrolyte, LP 30, has been included here as well, demonstrating its low flash point and highly flammable nature. A popular fire-retardant solvent, trimethyl phosphate (TMP), can raise an electrolyte's flash point, but the inclusion of flammable co-solvents places a limit to the extent of the increase in the flash point, consistent with the observations of Hess *et al.*. However, inclusion of TMP would certainly decrease the electrolyte blend's resultant self-extinguishing time (SET) to the point of non-flammability, despite a relatively lower flash point, a behaviour we observed as well in our SET experiments (not shown here).<sup>1</sup> For the PC-based electrolytes, two different diluents (A and B) were investigated and both resulted in non-flammable electrolyte blends (TEL 43e and TEL 58a are identical apart from the type of diluent used). The flash point testing results of these PC-majority electrolyte blends conclusively indicate that such electrolytes would likely not catch fire even under abuse conditions, alleviating fears of thermal runaway leading to fires/explosions of Faradion's Na-ion batteries using such electrolytes.

**Table S2** Closed-cup flash point testing results on various Na-ion liquid electrolytes.

| # | Sample       | Description                                                                         | Flash Point Testing Results                                                | Method                           |
|---|--------------|-------------------------------------------------------------------------------------|----------------------------------------------------------------------------|----------------------------------|
| 1 | LP 30        | 1 M LiPF <sub>6</sub> in EC:DMC = 1:1 v/v                                           | 32.0 °C                                                                    | IP 170 (Abel closed-cup)         |
| 2 | TEL 0        | NaPF <sub>6</sub> in EC:DEC:PC = 1:2:1 wt/wt                                        | 38.5 °C                                                                    | IP 170 (Abel closed-cup)         |
| 3 | TEL 0+ (131) | NaPF <sub>6</sub> in EC:DEC:PC = 1:3:1 wt/wt                                        | 37 °C                                                                      | IP 170 (Abel closed-cup)         |
| 4 | 151          | NaPF <sub>6</sub> in EC:EMC:PC = 1:5:1 wt/wt                                        | 26.5 °C                                                                    | IP 170 (Abel closed-cup)         |
| 3 | TEL 14d      | NaBF <sub>4</sub> in (EC:DEC:PC = 1:2:1 wt/wt):TMP = 1:1 wt/wt with 2 wt% additives | 44 °C                                                                      | IP 170 (Abel closed-cup)         |
| 4 | TEL 24b      | NaPF <sub>6</sub> in EC:DEC:PC = 1:2:1 wt/wt with 2 wt% additives                   | 38.5 °C                                                                    | IP 170 (Abel closed-cup)         |
| 5 | TEL 43c      | NaPF <sub>6</sub> in PC with 40wt% diluent A and 3 wt% additives                    | No flash point detected till 120 °C; sample emitted black smoke from 90 °C | IP 34 (Pensky Marten closed-cup) |
| 6 | TEL 43e      | NaPF <sub>6</sub> in PC with 20wt% diluent A and 3 wt% additives                    | No flash point detected till 120 °C; sample emitted black smoke from 90 °C | IP 34 (Pensky Marten closed-cup) |
| 7 | TEL 49d      | NaBF <sub>4</sub> in PC:TMP = 1:1 wt/wt with 20 wt% diluent                         | No flash point detected till 120 °C; sample emitted black                  | IP 34 (Pensky Marten)            |

|          |                | A and 4wt% additives                                                    | smoke from 90 °C                                                                 | closed-cup)                            |
|----------|----------------|-------------------------------------------------------------------------|----------------------------------------------------------------------------------|----------------------------------------|
| <b>8</b> | <b>TEL 58a</b> | NaPF <sub>6</sub> in PC with 20 wt%<br>diluent B and 3 wt%<br>additives | No flash point detected till 120<br>°C; sample emitted black<br>smoke from 90 °C | IP 34 (Pensky<br>Marten<br>closed-cup) |

### **Supplementary Note 3: Voltammetry loop investigations on oxidative stabilities of PC-dominant Na-ion electrolytes**

**Method:** We quantitatively investigated the oxidative stability of three Na-ion electrolytes through Linear Sweep Voltammetry (LSV) loops. In these LSV experiments, three-electrode pouch cells were fabricated with the cathode and anode consisting of just pure Al current collector foils. In these LSV experiments, the filled three-electrode cells were cycled at a slow 2 mV/s scan rate to 3.8 V *vs* Na/Na<sup>+</sup> (based on the Na reference electrode), cycled back down to 2.5 V and then cycled again to the next upper cut-off potential. This process was repeated with the following cut-off potentials: 3.8 V, 4.2 V, 4.4 V, 5 V and finally to 8 V. Such an experiment, which can be regarded as a cross between a cyclic voltammetry and LSV experiment, is advantageous in providing accurate values of charge passed at any potential band (such as 4.4 – 5 V *vs* Na/Na<sup>+</sup>). It should be noted that such types of experiments are heavily influenced by the scan rate of the experiment – faster scan rates such as 10 mV/s (used quite frequently in the literature) tend to underestimate degree of electrolyte oxidation due to kinetic (polarisation) effects. This is why a slow value of 2 mV/s was chosen in this experiment to avoid such complications.

Since these three-electrode cells contain no active materials on the cathode/anode, it is thought that the magnitude of charge passed provides an indication to the extent of electrolyte oxidation on the Al current collectors: the lower the charge consumed, the less the electrolyte would be prone to oxidation and hence, the better the electrolyte's performance will be when used in actual Na-ion cells and charged to voltages of similar magnitude. Of course, it is known that the conductive carbon and/or the cathode active material present in actual full cells can act as catalysts for the electrolyte oxidation reactions at such high potentials. Keeping in mind that such possible catalytic effects might be transpiring in actual full cells, we chose to use very high upper cut-off potentials, such as 5 V or 8 V *vs* Na/Na<sup>+</sup>: such high potential values might serve as a substitute for such catalysing effects, which will not occur in these three-electrode cells using Al current collectors and, as such, might provide a more representative picture of the level of electrolyte oxidation experienced in actual full cells.

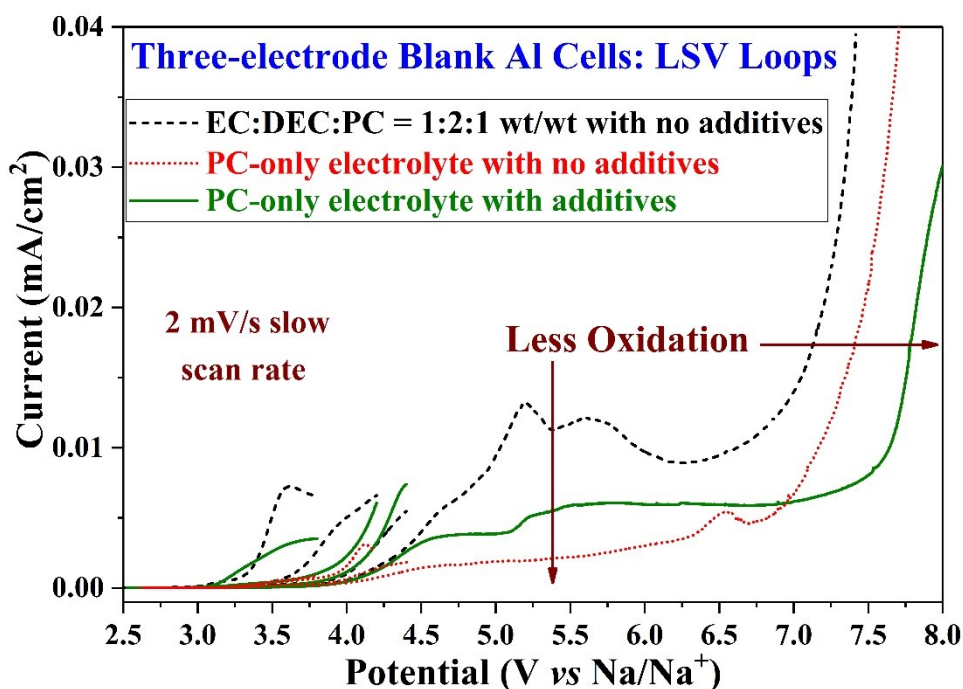

**Fig. S9** LSV Loop investigations on three-electrode pouch cells based on bare Al cathodes and anodes filled with PC-only or EC:DEC:PC = 1:2:1 electrolytes. The salt used here is NaPF<sub>6</sub> at the same concentration.

**Results:** Fig. S9 presents the actual current-voltage curves obtained: as indicated by the arrows, the lower the current at a particular voltage value, and the higher the voltage value before complete electrolyte breakdown (indicated by the exponential increase in current above 7 V), the less susceptible the electrolyte should be to oxidation in actual Na-ion cells. From Fig. S9, it is qualitatively apparent that the two PC-based electrolytes demonstrated a much lower charge current at various potential bands, along with higher onset of complete electrolyte breakdown with respect to the baseline electrolyte, based on a EC:DEC:PC solvent blend.

**Table S3** Magnitude of charge passed at various potential bands investigated in the LSV loop experiments. Values in parentheses indicate the relative differences in magnitude of Electrolytes 2 and 3 vs Electrolyte 1.

| # | Electrolyte                                        | Q(mC):<br>3.8 – 4.2 V<br>(% wrt<br>Case 1) | Q (mC):<br>4.2 – 4.4 V<br>(% wrt<br>Case 1) | Q (mC):<br>4.4 – 5 V<br>(% wrt Case<br>1) | Q (mC):<br>5 – 8 V<br>(% wrt<br>Case 1) | Total Q (mC):<br>3.8 – 8 V<br>(% wrt Case 1) |
|---|----------------------------------------------------|--------------------------------------------|---------------------------------------------|-------------------------------------------|-----------------------------------------|----------------------------------------------|
| 1 | NaPF <sub>6</sub> in<br>EC:DEC:PC =<br>1:2:1 wt/wt | 1.06                                       | 0.43                                        | 2.79                                      | 150.78                                  | 155.05                                       |
| 2 | NaPF <sub>6</sub> in PC                            | 0.39<br>(-63.4 %)                          | 0.22<br>(-49.2 %)                           | 1.07<br>(-61.4 %)                         | 69.67<br>(-53.8%)                       | 71.35<br>(-54 %)                             |
| 3 | NaPF <sub>6</sub> in PC<br>with additives          | 0.55<br>(-48 %)                            | 0.45<br>(+4.2 %)                            | 1.99<br>(-28.6 %)                         | 51.23<br>(-66 %)                        | 54.21 (-65 %)                                |

Table S3 above provides quantitative values of the charge passed (in units of mC) by the respective electrolyte solutions in the various potential bands studied. All three electrolytes studied contained the same concentration of  $\text{NaPF}_6$  salt. From Table S3, it becomes clear that Electrolyte 2 (PC as the sole solvent) demonstrated much lower charge passed at each potential band, particularly the two higher potential bands of 4.4 – 5 V and 5 – 8 V. In fact, the irreversible charge consumed due to electrolyte oxidation for Electrolyte 2 was 54% lower than Electrolyte 1 over the total 3.8 – 8 V range studied in this experiment.

Electrolyte 3, which is also PC-based, included targeted electrolyte additives to serve various functions, one of them being to ensure excellent high voltage performance. The impact of the additives is obvious from this table: Electrolyte 3 demonstrated the lowest total irreversible charge consumed over the entire 3.8 – 8 V range out of all three electrolytes studied and was 65% lower than Electrolyte 1.



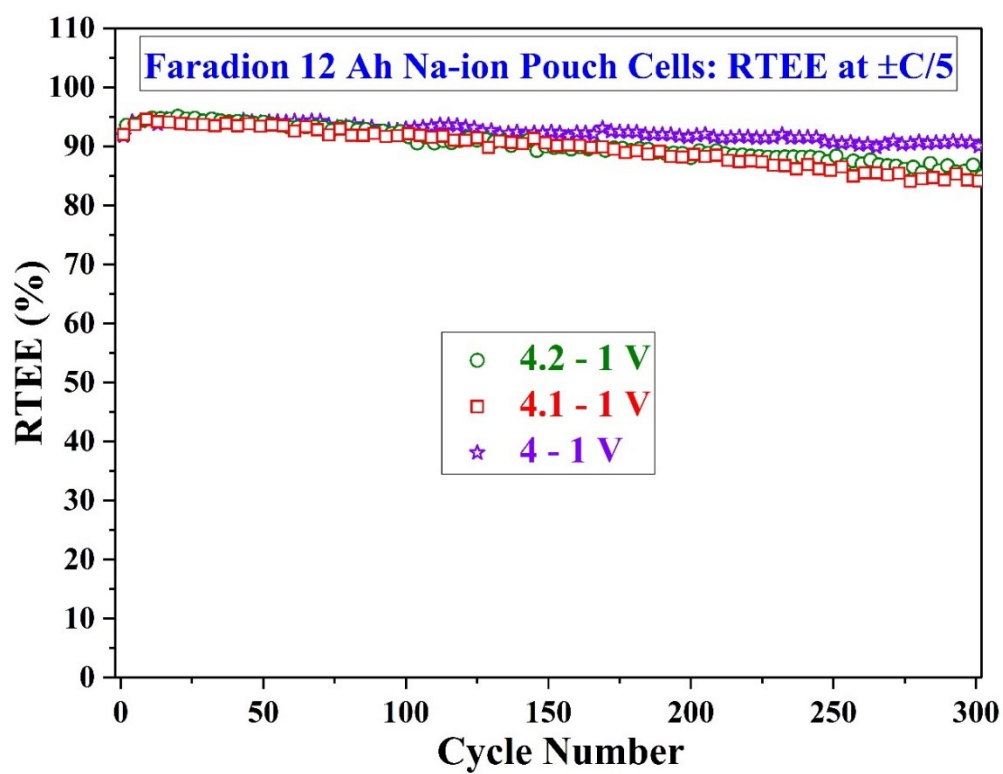

**Fig. S10** Round-Trip-Energy-Efficiency (RTEE) of Faradion's 12 Ah Na-ion pouch cells at  $\pm C/5$  at three different voltage windows. RTEE values of ~94-95 % were obtained, indicating the excellent efficiency of Faradion's first generation Na-ion production-category pouch cells.

**Table S4** Comparison of Na-ion full cells reported in the literature with capacity exceeding 50 mAh

| #                  | Cell Type          | Cathode                                                                                                         | Anode       | Electrolyte                                                        | ED (Wh/kg) | Av. Disch. V (V) | Cycling Stability                                                    | V Window    | Ref.          |
|--------------------|--------------------|-----------------------------------------------------------------------------------------------------------------|-------------|--------------------------------------------------------------------|------------|------------------|----------------------------------------------------------------------|-------------|---------------|
| <b>18650 Cells</b> |                    |                                                                                                                 |             |                                                                    |            |                  |                                                                      |             |               |
| <b>1</b>           | 18650 (~570 mAh)   | $\text{Na}_3\text{V}_2(\text{PO}_4)_2\text{F}_3$                                                                | Hard Carbon | 1 M $\text{NaPF}_6$ in EC:PC + 0.5% NaODFB + 3% PS + 1% SN + 3% VC | -          | ~3.6 at 55 °C    | -                                                                    | 4.25 – 2 V  | <sup>2</sup>  |
| <b>2</b>           | 18650 (430 mAh)    | R- $\text{Na}_2\text{Fe}_2(\text{CN})_6$                                                                        | Hard Carbon | 1 M $\text{NaBF}_4$ in Tetraglyme                                  | 43         | 3.0              | 100% capacity, 93% energy retention in 100 cycles at $\pm\text{C}/5$ | 3.4 – 1 V   | <sup>3</sup>  |
| <b>3</b>           | 18650 (560 mAh)    | $\text{Na}_{3.2}\text{V}_{1.8}\text{Zn}_{0.2}(\text{PO}_4)_3$                                                   | Hard Carbon | 1 M $\text{NaBF}_4$ in Tetraglyme                                  | 60         | 3.25             | 90% capacity retention in 200 cycles at $\pm\text{C}/5$              | 4.1 – 1 V   | <sup>4</sup>  |
| <b>4</b>           | 18650              | O3- $\text{Na}_{0.9}\text{Cu}_{0.12}\text{Ni}_{0.10}\text{Fe}_{0.30}\text{Mn}_{0.43}\text{Ti}_{0.05}\text{O}_2$ | Hard Carbon | 1 M $\text{NaBF}_4$ in Tetraglyme                                  | 62         | 3.0              | 87% capacity retention in 80 cycles at $\pm\text{C}/5$               | 4.1 – 1 V   | <sup>5</sup>  |
| <b>5</b>           | 18650              | $\text{Na}_3\text{V}_2(\text{PO}_4)_2\text{F}_3$                                                                | Hard Carbon | 1 M $\text{NaPF}_6$ in EC:DMC                                      | 75         | 3.4              | 80% capacity retention in 3750 cycles at $\pm 1\text{ C}$            | 4.25 – 2 V  | <sup>6</sup>  |
| <b>6</b>           | 18650 (~1 Ah)      | O3- $\text{NaNi}_{0.45}\text{Zn}_{0.05}\text{Mn}_{0.4}\text{Ti}_{0.1}\text{O}_2$                                | Hard Carbon | 1 M $\text{NaPF}_6$ in EC:DMC                                      | ~97        | ~2.85            | -                                                                    | 4.4 – 1.2 V | <sup>7</sup>  |
| <b>Pouch Cells</b> |                    |                                                                                                                 |             |                                                                    |            |                  |                                                                      |             |               |
| <b>1</b>           | 880 mAh Pouch Cell | $\text{NaNi}_{1/3}\text{Fe}_{1/3}\text{Mn}_{1/3}\text{O}_2$                                                     | Hard Carbon | 0.8 M $\text{NaPF}_6$ in PC:EMC with additives                     | -          | ~2.75            | 80% capacity retention in 2500 cycles at $\pm 1\text{ C}$            | 3.8 – 1.5 V | <sup>8</sup>  |
| <b>2</b>           | 880 mAh Pouch Cell | $\text{NaNi}_{1/3}\text{Fe}_{1/3}\text{Mn}_{1/3}\text{O}_2$                                                     | Hard Carbon | 1.5 M $\text{NaPF}_6$ in F-EPE:TMP = 1:2 v/v with 2 wt% FEC        | -          | ~2.9             | 70.8% capacity retention in 500 cycles at $\pm 1\text{ C}$           | 3.8 – 1.5 V | <sup>9</sup>  |
| <b>3</b>           | 5 Ah Pouch Cell    | $\text{Na}_{2-x}\text{Fe}_2(\text{CN})_6$                                                                       | Hard Carbon | 1 M $\text{NaPF}_6$ in EC:DEC = 1:1 v/v with 2 vol% FEC            | -          | ~2.6             | 78% capacity retention in 1000 cycles at $\pm 1\text{ C}$            | 3.2 – 1 V   | <sup>10</sup> |
| <b>4</b>           | 1 Ah Pouch Cell    | $\text{NaNi}_{1/3}\text{Fe}_{1/3}\text{Mn}_{1/3}\text{O}_2$                                                     | Hard Carbon | 1 M $\text{NaPF}_6$ in PC:EMC = 1:1 v/v with 2 wt% FEC             | 95         | ~2.95            | 92.6% capacity retention in 100 cycles at $\pm 1\text{ C}$           | 3.8 – 2 V   | <sup>11</sup> |
| <b>5</b>           | 110 mAh Pouch Cell | O3- $\text{NaNi}_{0.5}\text{Mn}_{0.3}\text{Co}_{0.2}\text{O}_2$                                                 | Hard Carbon | 1 M $\text{NaClO}_4$ in EC:DEC                                     | 100        | ~2.9             | ~50% capacity retention in 70 cycles at $\pm\text{C}/5$              | 4 – 1.5 V   | <sup>12</sup> |
| <b>6</b>           | 2 Ah               | O3-                                                                                                             | Anthraci    | 0.8 M $\text{NaPF}_6$                                              | 100        | 3.2              | ~94%                                                                 | 4 – 1.5 V   | <sup>13</sup> |

|                       |                       |                                                                               |                       |                                                                                                 |           |       |                                                                           |              |               |
|-----------------------|-----------------------|-------------------------------------------------------------------------------|-----------------------|-------------------------------------------------------------------------------------------------|-----------|-------|---------------------------------------------------------------------------|--------------|---------------|
|                       | Pouch Cell            | $\text{Na}_{0.9}[\text{Cu}_{0.22}\text{Fe}_{0.30}\text{Mn}_{0.48}]\text{O}_2$ | te Hard Carbon        | in PC:EMC with additives                                                                        |           |       | capacity retention in 50 cycles at $\pm\text{C}/10$                       |              |               |
| <b>7</b>              | 0.5 - 5 Ah Pouch Cell | $\text{Na}_x\text{MnFe}(\text{CN})_6$                                         | Hard Carbon           | -                                                                                               | 100 – 130 | 3.2   | 98.6% capacity retention in 500 cycles at $\pm 1\text{ C}$                | 4 – 1.5 V    | <sup>14</sup> |
| <b>8</b>              | Pouch Cell            | O3- $\text{Na}_x[\text{Li-Cu-Fe-Mn}]\text{O}_2$                               | Amorphous Hard Carbon | -                                                                                               | 135       | ~2.83 | 91% capacity retention in 1000 cycles at $\pm 3\text{ C}$                 | 4 – 1.5 V    | <sup>15</sup> |
| <b>9</b>              | 12 Ah Pouch Cell      | Gen 2 Cathode                                                                 | Hard Carbon           | $\text{NaPF}_6$ in EC:DEC:PC = 1:2:1 wt/wt with additives                                       | 160       | 3.2   | 80% capacity retention in > 3,000 cycles at $\pm 1\text{ C}$ at 4 – 1 V   | 4.2 – 1 V    | Far 2020      |
| <b>Prismatic Cell</b> |                       |                                                                               |                       |                                                                                                 |           |       |                                                                           |              |               |
| <b>1</b>              | 27 Ah Prismatic Cell  | O3- $\text{NaCrO}_2$                                                          | Hard Carbon           | $\text{Na}[\text{FSA}]-[\text{C}_3\text{C}_1\text{pyrr}][\text{FSA}] = 20:80$ mol% ionic liquid | 75        | ~2.7  | 87% capacity retention in 500 cycles at $\pm\text{C}/2.7$ at <b>60 °C</b> | 3.35 – 1.5 V | <sup>16</sup> |

**Note:** In compiling this list, we didn't include any full cells that used pre-sodiation/pre-cycling techniques to deal with irreversible capacities of the anode or cathode, as such methods are currently not commercially feasible and it would take significant efforts to make it so.

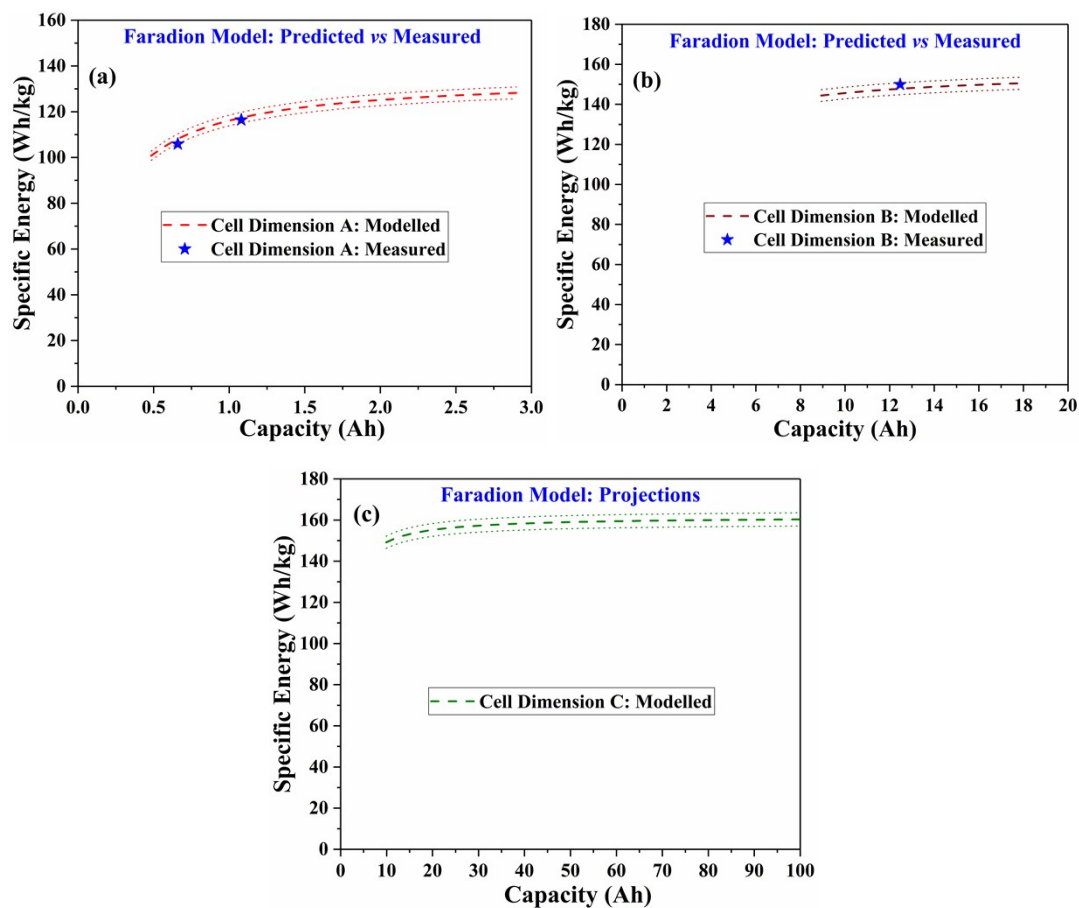

**Fig. S11** Illustrations showing the accuracy of Faradion's Na-ion modelling capabilities across various cell dimensions corresponding to different pouch cell capacities. For Na-ion pouch cells with (a) Dimension A (corresponding to cell capacities under 3 Ah) and (b) Dimension B (corresponding to cell capacities around 8 – 18 Ah), the predicted specific energy values (dashed lines) match those of the measured values determined experimentally (solid points), within  $\pm 2\%$  (the dotted lines). (c) Using Faradion's model, the projected specific energies using cell Dimension C (for larger-scale pouch cells with higher capacities) indicate  $\sim 160$  Wh/kg is achievable in 32 Ah pouch cells using Faradion's Na-ion chemistry; confirmation is underway.

## Effect of Active Material Loading on Cell-level Energy Density

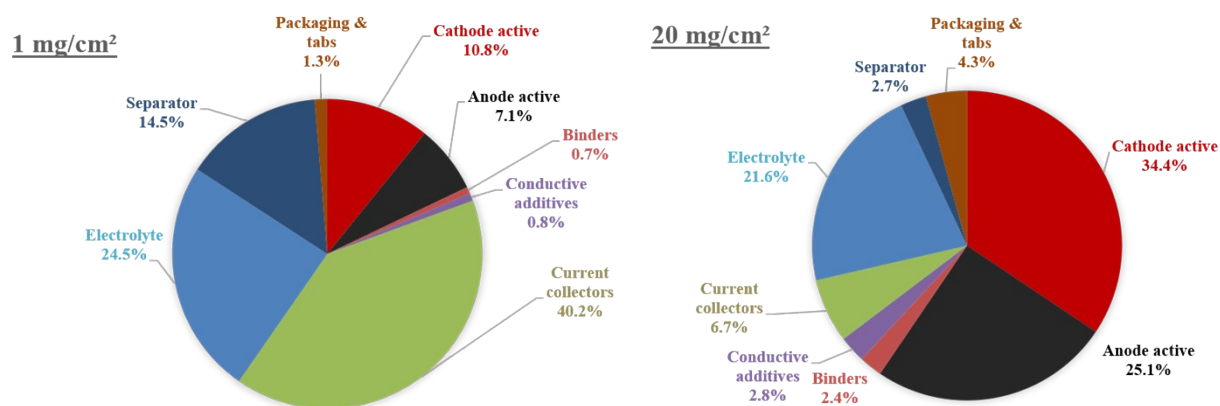

**Fig. S12** Illustration of how the loading of active materials in an alkali-ion pouch cell affects the relative proportions between the electroactive components (active materials) and electrochemically inactive components in a cell. Two cases are shown: one with cathode loading of just 1 mg/cm<sup>2</sup> (often used in academic reports) and a much higher cathode loading of 20 mg/cm<sup>2</sup> (a value which could be used in typical commercial-scale cells). The anode loading is appropriately adjusted to keep the same cell balance.



#### Supplementary Note 4: Cost comparisons between LFP//Graphite Li-ion and Faradion's Na-ion pouch cells

Fig S13 shows a comparison of a commercial LFP//Graphite cell and Faradion's Na-ion cell based on our Gen 2 cathode//commercial hard carbon anode. The cell material cost is broken down by cell component, and modelled using BatPac v3, using today's commercial values for all cell components and, the inputs use material physical properties and electrochemical performance of Faradion's Na-ion cells.

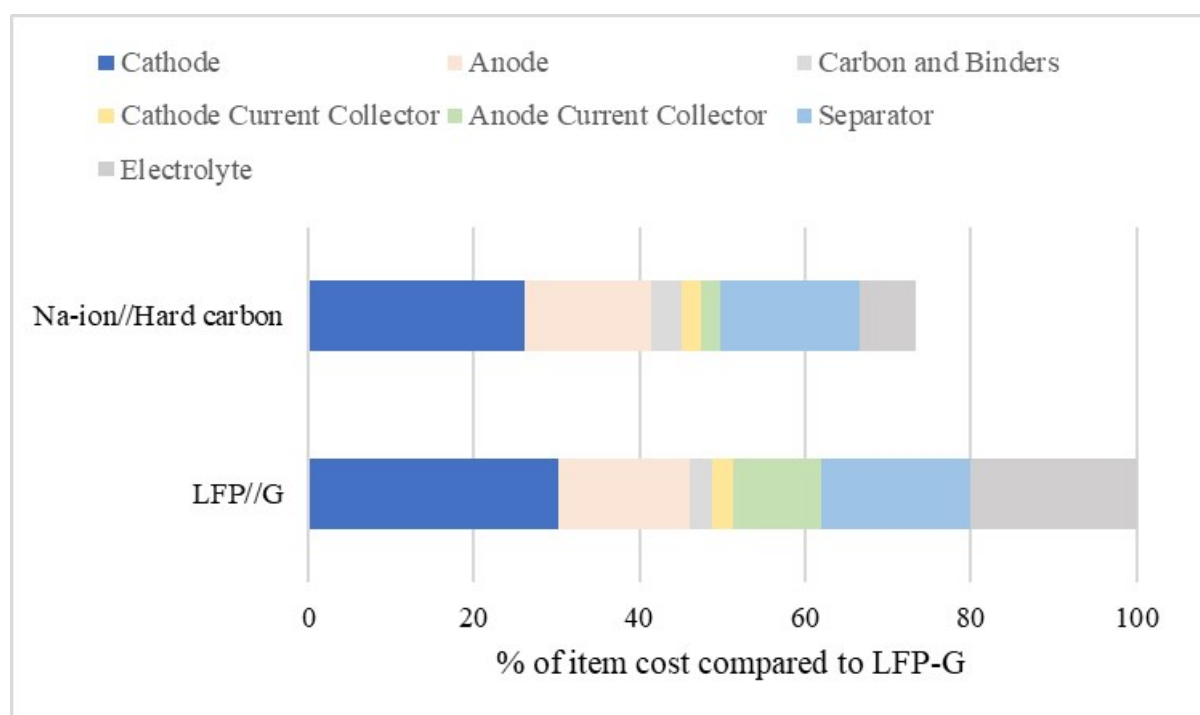

**Fig. S13** Cost comparisons of LFP//Graphite Li-ion pouch cells with that of Faradion's Na-ion pouch cells. The costs have been normalised with respect to those of the LFP//Graphite system.

## References

1. S. Hess, M. Wohlfahrt-Mehrens and M. Wachtler, *Journal of The Electrochemical Society*, 2015, **162**, A3084-A3097.
2. G. Yan, K. Reeves, D. Foix, Z. Li, C. Cometto, S. Mariyappan, M. Salanne and J.-M. Tarascon, *Advanced Energy Materials*, 2019, **9**, 1901431.
3. L. U. Subasinghe, G. S. Reddy, A. Rudola and P. Balaya, *Journal of the Electrochemical Society*, 2020, **167**, 110504.
4. K. Du, C. Wang, L. U. Subasinghe, S. R. Gajella, M. Law, A. Rudola and P. Balaya, *Energy Storage Materials*, 2020, **29**, 287-299.
5. A. Tripathi, A. Rudola, S. R. Gajella, S. Xi and P. Balaya, *Journal of Materials Chemistry A*, 2019, **7**, 25944-25960.
6. T. Broux, F. Fauth, N. Hall, Y. Chatillon, M. Bianchini, T. Bamine, J.-B. Leriche, E. Suard, D. Carlier, Y. Reynier, L. Simonin, C. Masquelier and L. Croguennec, *Small Methods*, 2019, **3**, 1800215.
7. S. Mariyappan, T. Marchandier, F. Rabuel, A. Iadecola, G. Rousse, A. V. Morozov, A. M. Abakumov and J.-M. Tarascon, *Chemistry of Materials*, 2020, **32**, 1657-1666.
8. H. Che, X. Yang, Y. Yu, C. Pan, H. Wang, Y. Deng, L. Li and Z.-F. Ma, *Green Energy & Environment*, 2020.
9. Y. Yu, H. Che, X. Yang, Y. Deng, L. Li and Z.-F. Ma, *Electrochemistry Communications*, 2020, **110**, 106635.
10. W. Wang, Y. Gang, Z. Hu, Z. Yan, W. Li, Y. Li, Q.-F. Gu, Z. Wang, S.-L. Chou, H.-K. Liu and S.-X. Dou, *Nature Communications*, 2020, **11**, 980.
11. Y. Xie, G.-L. Xu, H. Che, H. Wang, K. Yang, X. Yang, F. Guo, Y. Ren, Z. Chen, K. Amine and Z.-F. Ma, *Chemistry of Materials*, 2018, **30**, 4909-4918.
12. V. K. Kumar, S. Ghosh, S. Biswas and S. K. Martha, *Journal of The Electrochemical Society*, 2020, **167**, 080531.
13. Y. Li, Y.-S. Hu, X. Qi, X. Rong, H. Li, X. Huang and L. Chen, *Energy Storage Materials*, 2016, **5**, 191-197.
14. A. Bauer, J. Song, S. Vail, W. Pan, J. Barker and Y. Lu, *Advanced Energy Materials*, 2018, **8**, 1702869.
15. X. Rong, Y. Lu, X. Qi, Q. Zhou, W. Kong, K. Tang, L. Chen and Y. Hu, *Energy Storage Science and Technology*, 2020, **9**, 515-522.
16. A. Fukunaga, T. Nohira, R. Hagiwara, K. Numata, E. Itani, S. Sakai and K. Nitta, *Journal of Applied Electrochemistry*, 2016, **46**, 487-496.
